# Supplementary material for: Analysis of TTG1 function in Arabis alpina
Source: PubMed Central journal article supplement (PMC3904473; doi:10.1186/1471-2229-14-16), 2014-01-10
Supplement: 1471-2229-14-16-S1.pdf [file 1471-2229-14-16-S1.pdf]

**Table S1:** Comparison of amino acid (aa) sequences between AtTTG1 and AaTTG1

| <b>aa exchange</b> | <b>aa position in <i>A. alpina</i></b> | <b>aa position in <i>A. thaliana</i></b> |
|--------------------|----------------------------------------|------------------------------------------|
| D to E             | 19                                     | 19                                       |
| L to S, S to AGT   | 32, 34, 35, 36                         | 32, 34                                   |
| S to T             | 59                                     | 57                                       |
| V to I             | 67                                     | 65                                       |
| P to S             | 69                                     | 67                                       |
| F to V             | 75                                     | 73                                       |
| E to D             | 76                                     | 74                                       |
| S to A             | 96                                     | 94                                       |
| I to V             | 112                                    | 110                                      |
| I to V             | 122                                    | 120                                      |
| S to A             | 123                                    | 121                                      |
